# Supplementary material
Source: Springer Nature journal article supplement (https://springermedizin.de/resource/supplementary/12885_2009_1544_MOESM1_ESM.pdf/9472282)
Supplement: MOESM1 [file 9472282]

Referral by Oncologists/Urologists  
Western Australia/Queensland

Screening/Baseline testing

Patients randomly assigned  
(n = 195)

resistance/impact loading  
(n = 65)

usual care/delayed  
exercise (n = 65)

resistance/cardiovascular  
(n = 65)

Received allocated  
intervention

Received allocated  
intervention

Received allocated  
intervention

Analyzed

Analyzed

Analyzed
